# Supplementary material for: Chestnuts in Fermented Rice Beverages Increase Metabolite Diversity and Antioxidant Activity While Reducing Cellular Oxidative Damage
Source: MDPI journal article supplement (doi:10.3390/foods12010164), 2022-12-28
Supplement: s1 [file s1]

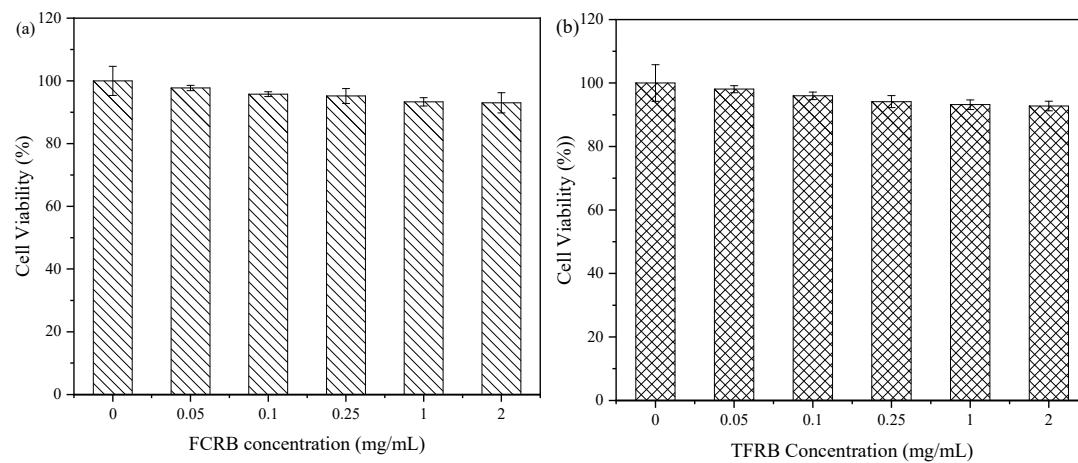

Figure S1. MTT assays of FCRB or TFRB cytotoxicity towards Caco-2 cells. The results are presented as means  $\pm$  SD ( $n = 3$ ). Viability of Caco-2 cells incubated for 24h with different concentration of FCRB (a) or TFRB (b).
