# Supplementary material for: Chestnuts in Fermented Rice Beverages Increase Metabolite Diversity and Antioxidant Activity While Reducing Cellular Oxidative Damage
Source: MDPI journal article supplement (doi:10.3390/foods12010164), 2022-12-28
Supplement: s1 [file s1]

**Table S1.** Linear regression of gallic acid, rutin and ferrous sulfate

| Name            | Regression Equation | R <sup>2</sup> |
|-----------------|---------------------|----------------|
| Gallic acid     | $Y=0.0057X-0.0067$  | 0.9977         |
| Rutin           | $Y=0.0133X-0.0042$  | 0.9978         |
| Ferrous sulfate | $Y=0.997X+0.0163$   | 0.9984         |
